# Supplementary material
Source: Springer Nature journal article supplement (https://www.springermedizin.de/resource/supplementary/12968_2012_2603_MOESM5_ESM.pdf/9582314)

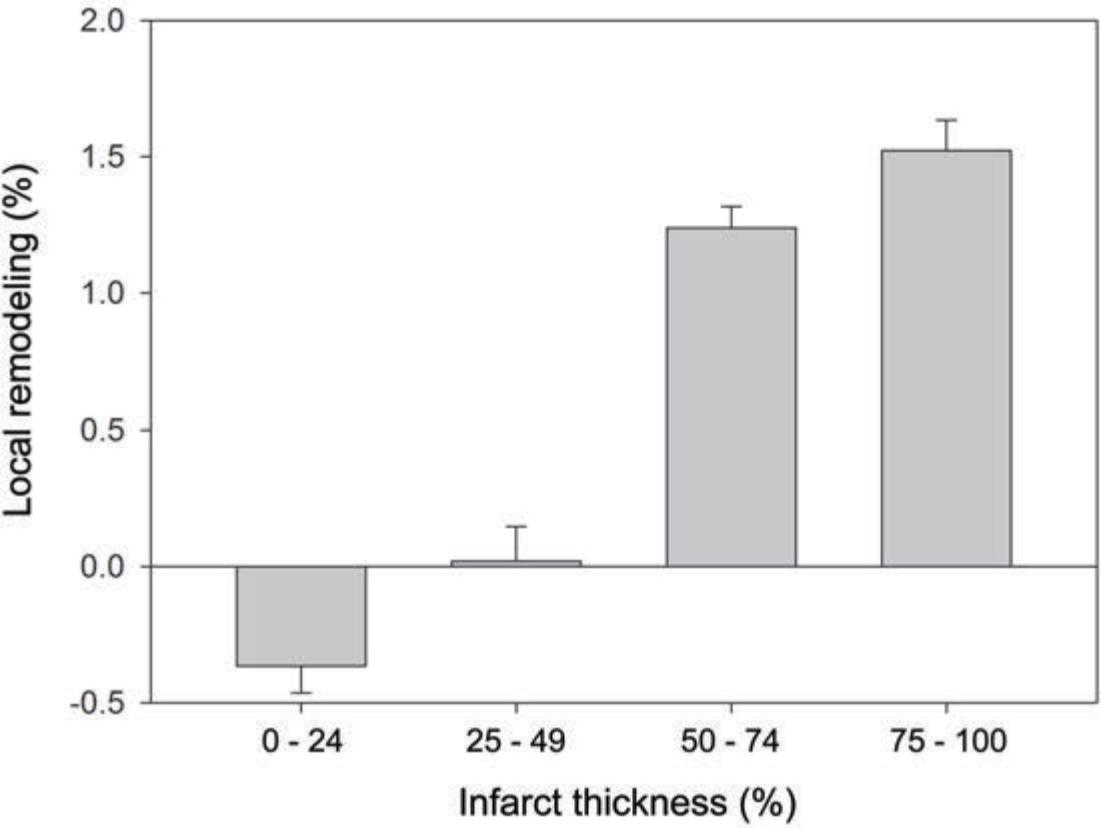

Supplement: MOESM5 [file 9582314]
